# Supplementary material for: Impact of Grape Products on Lipid Profile: A Meta-Analysis of Randomized Controlled Studies
Source: PubMed Central journal article supplement (PMC7073656; doi:10.3390/jcm9020313), 2020-01-22
Supplement: jcm-09-00313-s001.pdf [file jcm-09-00313-s001.pdf]

## Supplemental material

|                   |                                                                                                                                                                                                             |
|-------------------|-------------------------------------------------------------------------------------------------------------------------------------------------------------------------------------------------------------|
| <b>Figure S1.</b> | PRISMA Flow Diagram                                                                                                                                                                                         |
| <b>Figure S2.</b> | Changes in TC levels after administration of grape products as compared with controls                                                                                                                       |
| <b>Figure S3.</b> | Changes in HDL-C levels after administration of grape products as compared with controls.                                                                                                                   |
| <b>Figure S4.</b> | Changes in TG levels after administration of grape products as compared with control                                                                                                                        |
| <b>Figure S5.</b> | Funnel plots of effect size versus standard error for studies evaluating levels of TC (panel A), HDL-C (panel B), LDL-C (panel C) levels after administration of grape products or placebo.                 |
| <b>Figure S6.</b> | Funnel plots of effect size versus standard error (panel A) and Duval and Tweedie's trim and fill analysis (panel B) for studies evaluating levels of TG after administration of grape products or placebo. |
| <b>Table S1.</b>  | Meta-regression analyses for TC, HDL-C, TG and LDL-C.                                                                                                                                                       |

Figure S1. PRISMA Flow Diagram

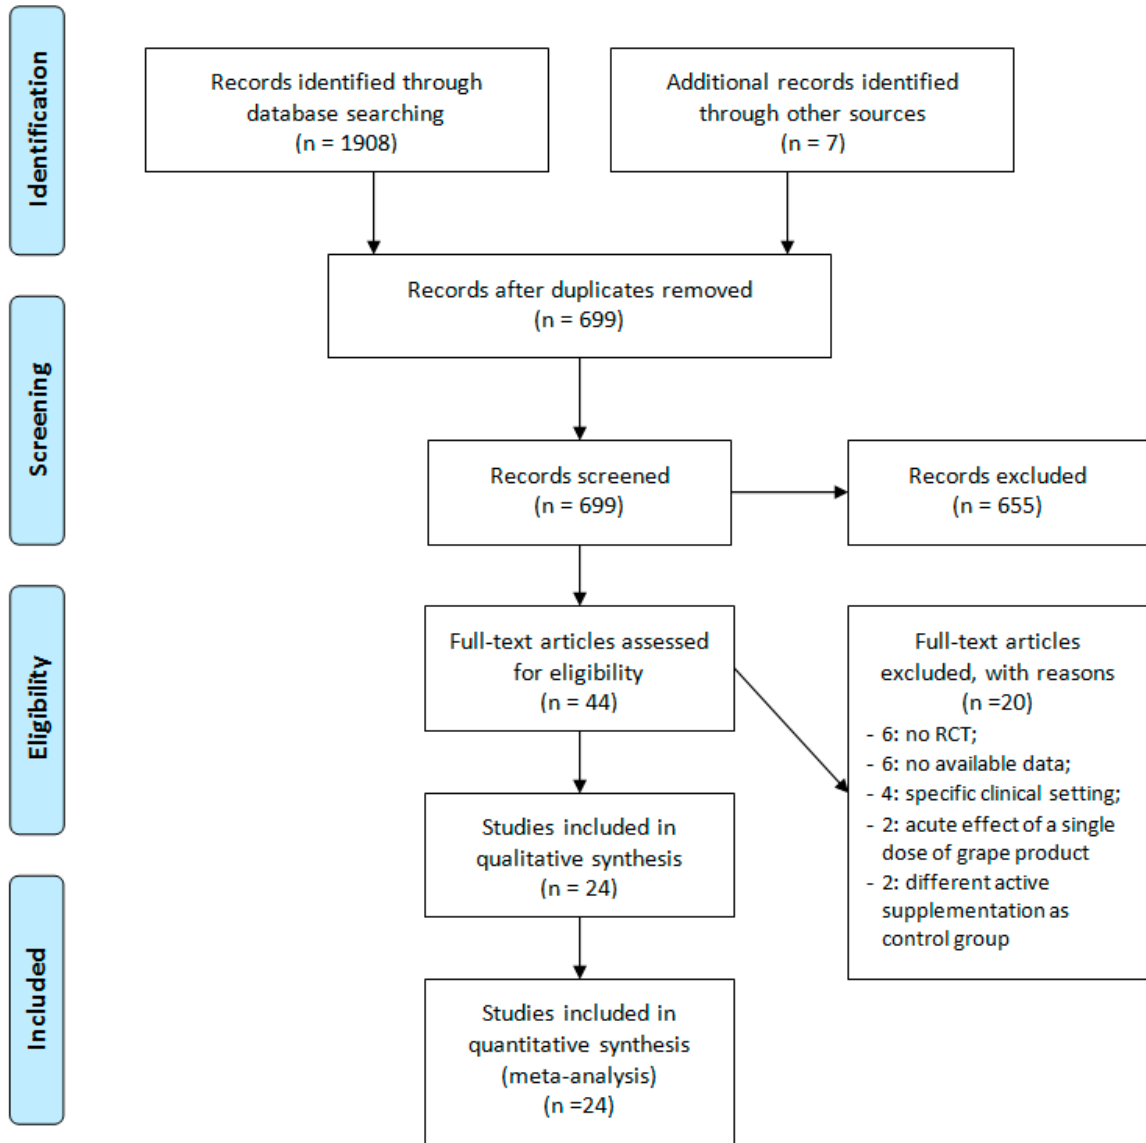

**Figure S2. Changes in TC levels after administration of grape products as compared with controls**

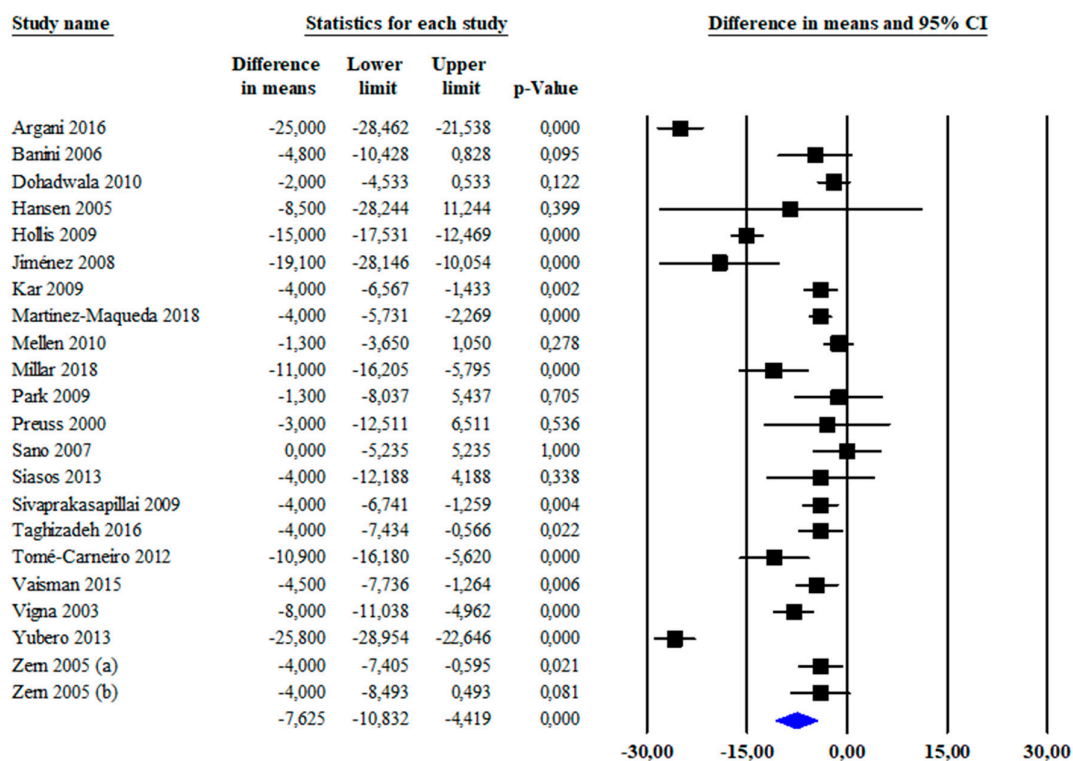

**Figure S3. Changes in HDL-C levels after administration of grape products as compared with controls.**

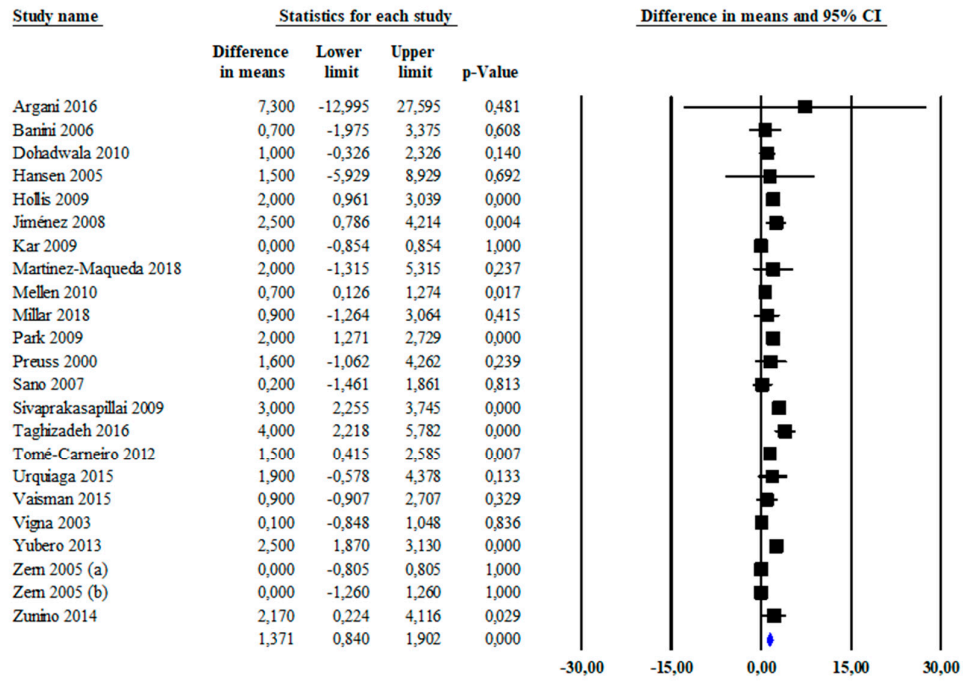

**Figure S4. Changes in TG levels after administration of grape products as compared with controls**

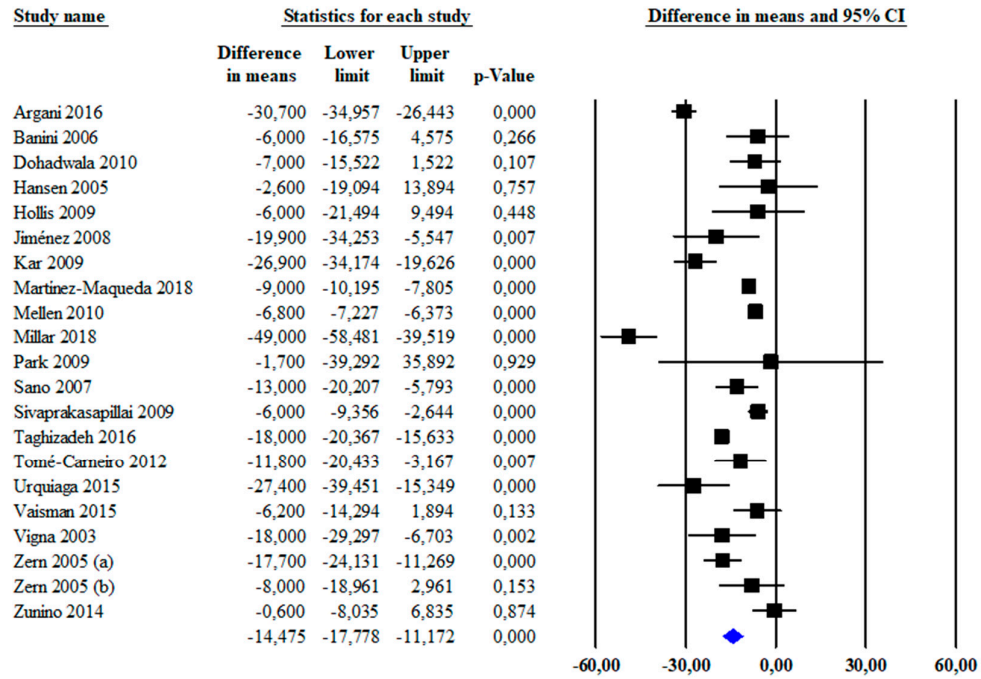

**Figure S5. Funnel plots of effect size versus standard error for studies evaluating levels of TC (panel A), HDL-C (panel B), LDL-C (panel C) after administration of grape products or placebo.**

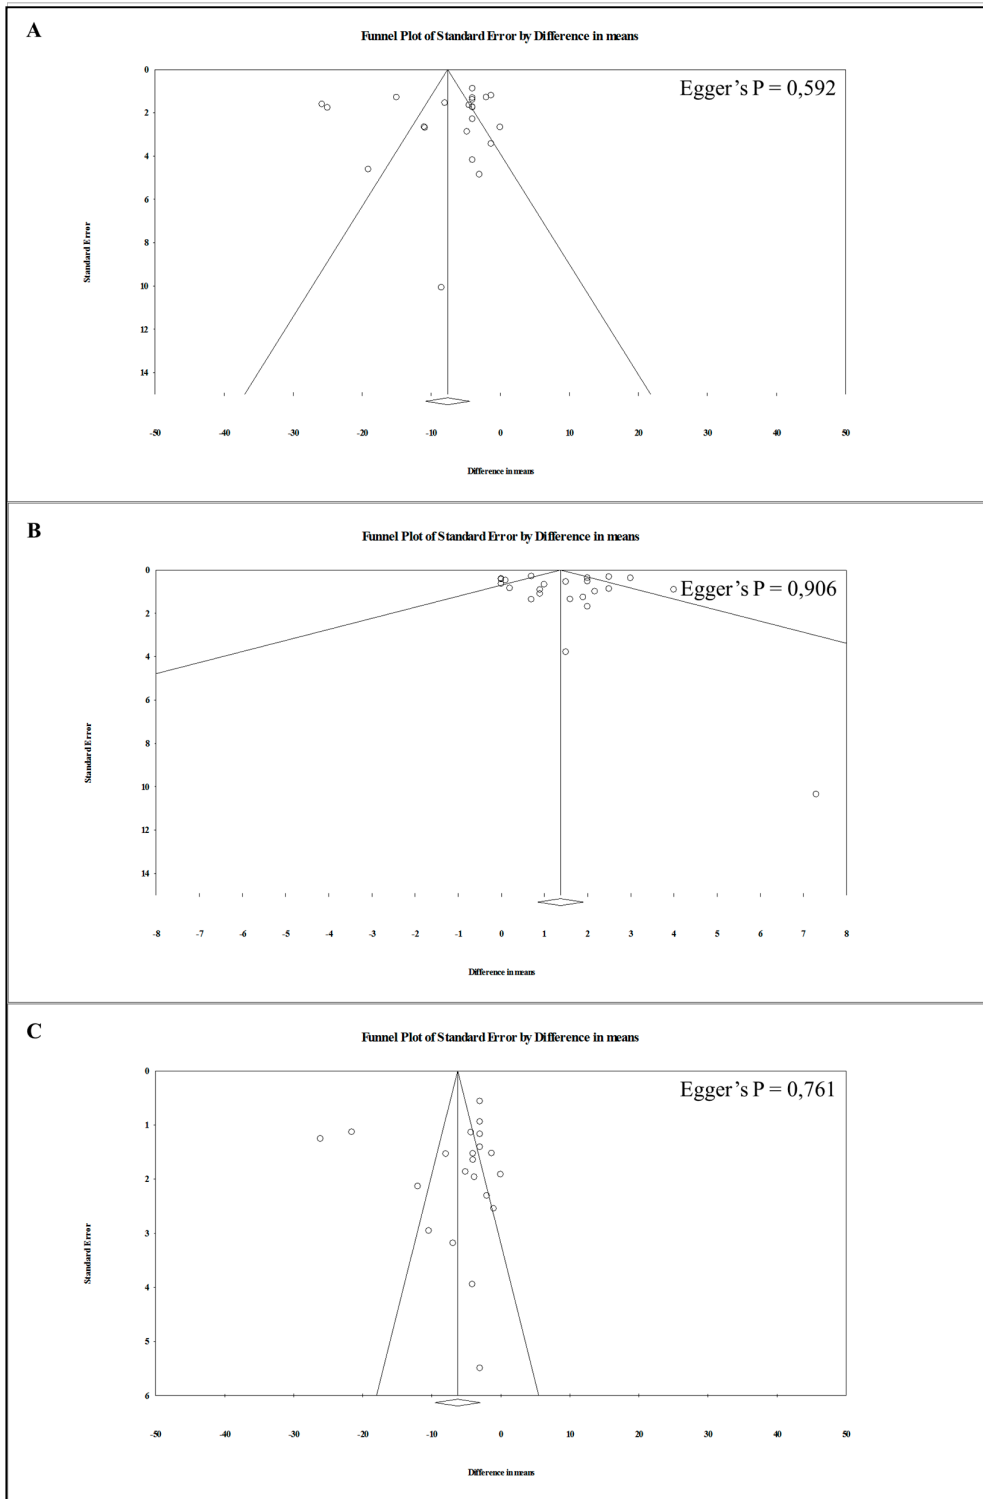

**Figure S6. Funnel plots of effect size versus standard error (panel A) and Duval and Tweedie's trim and fill analysis (panel B) for studies evaluating levels of TG after administration of grape products or placebo.**

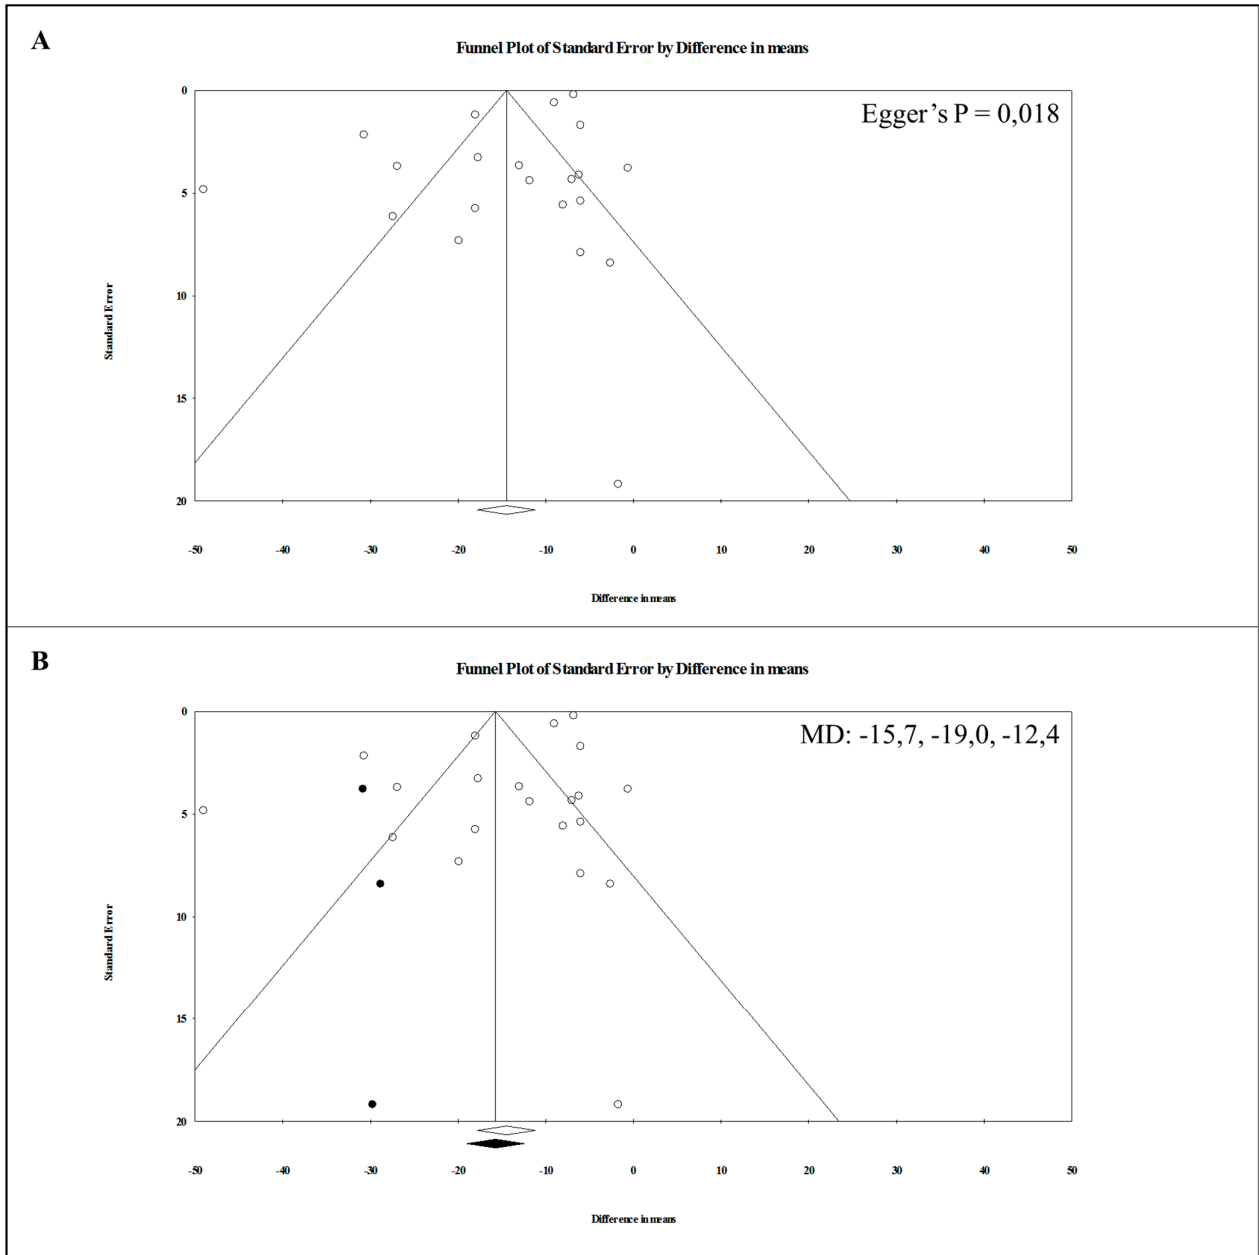

**Table S1. Meta-regression analyses for TC, HDL-C, TG and LDL-C.**

| <b>A) TC (22 datasets -21 studies)</b> | <b>Z-value</b> | <b>P-value</b> |
|----------------------------------------|----------------|----------------|
| Age                                    | 0.29           | 0.77           |
| Male gender                            | 0.34           | 0.73           |
| BMI                                    | 0.34           | 0.74           |
| Diabetes                               | 0.63           | 0.53           |
| Dyslipidemia                           | 0.19           | 0.85           |
| Follow up                              | -1.33          | 0.19           |

| <b>B) HDL-C (23 datasets – 22 studies)</b> | <b>Z-value</b> | <b>P-value</b> |
|--------------------------------------------|----------------|----------------|
| Age                                        | -2.58          | <b>0.01</b>    |
| Male gender                                | -0.19          | 0.85           |
| BMI                                        | -0.34          | 0.74           |
| Diabetes                                   | -1.54          | 0.12           |
| Dyslipidemia                               | -0.51          | 0.61           |
| Follow up                                  | 1.02           | 0.31           |

| <b>C) TG (21 datasets – 20 studies)</b> | <b>Z-value</b> | <b>P-value</b> |
|-----------------------------------------|----------------|----------------|
| Age                                     | -0.59          | 0.56           |
| Male gender                             | -0.34          | 0.73           |
| BMI                                     | 0.82           | 0.41           |
| Diabetes                                | -1.25          | 0.21           |
| Dyslipidemia                            | -1.86          | 0.06           |
| Follow up                               | -0,29          | 0.77           |

| <b>D) LDL-C (21 datasets – 20 studies)</b> | <b>Z-value</b> | <b>P-value</b> |
|--------------------------------------------|----------------|----------------|
| Age                                        | -0.19          | 0.84           |
| Male gender                                | 0.97           | 0.33           |
| BMI                                        | -0.24          | 0.81           |
| Diabetes                                   | 0.72           | 0.47           |
| Dyslipidemia                               | -0.13          | 0.90           |
| Follow up                                  | 0.23           | 0.82           |
